# Supplementary material for: Preparation of carbon quantum dot fluorescent probe from waste fruit peel and its use for the detection of dopamine
Source: Royal Society of Chemistry journal article supplement (doi:10.1039/d3ra06799h), 2024-01-01
Supplement: d3ra06799h1.pdf [file d3ra06799h1.pdf]

## Supporting Information

### Preparation of carbon quantum dot fluorescent probe from waste fruit peels and its use for the detection of dopamine

Li Han,<sup>\*a</sup> Yingkai Guo,<sup>b</sup> Haohao Zhang,<sup>a</sup> Zifan Wang,<sup>a</sup> Fan Zhang<sup>a</sup>, Yiran Wang<sup>a</sup>,  
Xingqi Li<sup>a</sup>, Ying Wang<sup>\*a</sup>, Jiajia Ye<sup>\*a</sup>

<sup>a</sup> School of Biological and Chemical Engineering, Qilu Institute of Technology, Jinan,  
250200, P. R. China. Li Han: hanli0226@163.com, Jiajia Ye: yejj0727@qlit.edu.cn,  
Ying Wang: yingwang20191231@163.com

<sup>b</sup> Ji nan Engineering consulting institute, Jinan, China

Supported by Research Program of Qilu Institute of Technology (No. QIT23NN009)

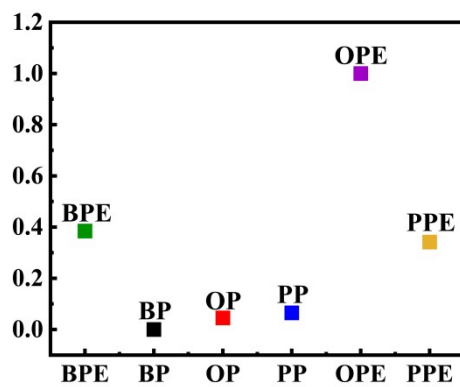

**Figure S1** Corresponding normalized graph of Figure 2a. (The normalization factor is  $1.79 \times 10^{-4}$ .)

**Table S1** Comparison of the advantages and disadvantages of this experiment with other existing DA detection techniques

| DA detection technology                | Detect defect                                                                                                                                                              | Detection advantage                                                          | Reference |
|----------------------------------------|----------------------------------------------------------------------------------------------------------------------------------------------------------------------------|------------------------------------------------------------------------------|-----------|
| Electrochemical analysis               | The experimental conditions are demanding and susceptible to interference by environmental factors.                                                                        | Highly sensitive and selective.                                              | [1]       |
| Chemiluminescence                      | To improve the luminescence performance of luminous materials, chemical reagents need to be used, and the preparation and reaction principle of materials are complicated. | Low detection cost and wide linear range.                                    | [2],[3]   |
| High-performance liquid chromatography | The sample needs to be strictly purified, otherwise, it is easy to block the column, and the column is expensive.                                                          | Simple and fast for detecting the target.                                    | [4],[5]   |
| Colorimetric analysis                  | When the detected substance is nmol, it cannot achieve effective detection of the target substance.                                                                        | Easy to operate, low cost, and the color change is visible to the naked eye. | [6]       |
| Fluorescence spectrophotometry         | It cannot be applied outside the laboratory.                                                                                                                               | High detection sensitivity, low cost, and simple instrument operation.       | [7]       |

[1] M. Sajid, N. Baig, K. Alhooshani, *Trends in Analytical Chemistry*, 2019, 118, 368-385.

[2] Y. X. Lan, F. Yuan, T. H. Fereja, C. Wang, B. Lou, J. P. Li, G. B. Xu, *Analytical chemistry*, 2018, 91, 2135-2139.

[3] L. Zhang, Y. Hou, C. Lv, W. Liu, Z. Zhang, X. Peng, *Analytical Methods*, 2020, 12, 4191-4198.

[4] S. Kongkiatpaiboon, N. Duangdee, S. Chewchinda, O. Poachanukoon, K. Amnuaypattanapon, *Journal of King Saud University Science*, 2019, 31, 48-51.

[5] M. Bouri, M. J. Lerma-García, R. Salghi, M. Zougagh, A. Ríos, *Talanta*, 2012, 99, 897–903.

[6] Z. B. Chen, C. M. Zhang, T. H. Zhou, H. Ma, *Microchim Acta*, 2015, 182, 1003–1008.

[7] X. Wei, Z. D. Zhang, Z. H. Wang, *Microchemical Journal*, 2019, 145, 55-58.
